# Supplementary material
Source: PubMed Central journal article supplement (PMC4542172)
Supplement: JB.00214-15_zjb999093729so1.pdf [file JB.00214-15_zjb999093729so1.pdf]

## Supplementary Figures and Tables

**Table S1: RT-qPCR oligonucleotides used in this study**

| Primer                   | Forward (5'-3')            | Reverse (5'-3')              |
|--------------------------|----------------------------|------------------------------|
| 16S <sup>1</sup>         | GCGGTTTGTTAAGTCAGATGTGAAA  | GACTCAAGCTTGCCAGTATCAGAT     |
| <i>aatA</i>              | CGTCAGCCCCAAAGATAATGAA     | TGAGCTTGAGGAGGCGAATA         |
| <i>astA</i>              | CCTGGGCTTCCTGGGATAAAA      | CACCGGGCAAAGGCATTTA          |
| <i>bglA</i>              | AAGTCGGCTGTATGCTGGCG       | CGAACATCACATCGTCCGGGT        |
| <i>cexE</i>              | GGCGAGATTGGCGGATATAGCTG    | CCTTTAGCAACTGTCTCATTACACGCG  |
| <i>clyA</i>              | CGTGTTAGACAGGGTGGTAA       | GGGCGTAGTTGAAGGAAAAC         |
| <i>cfaD</i>              | TGATTGTAGAGGCATGTCAA       | CCAACAAGGTTTTATTACCT         |
| <i>cfaA</i>              | CGGTACAACGAAGAATATGAAGTTGA | AAGGATAACTTTCTGAGGAGTGACTACA |
| <i>cfaB</i>              | GTTCAAATGCCTATCAGTGTGTCAT  | GCAGCAGCTTCAAATCCTTTGG       |
| <i>cfaC</i>              | CAATTTGGACGAATGGATCGT      | CCTGTCCGTATACCATCAATATCG     |
| <i>cfaE</i>              | CTTCTCTGAAACAAACTGG        | CGGAACACTGATTTCTGG           |
| <i>cooA</i> <sup>2</sup> | GTTGACCCGACTGTTGACCT       | ACAACGGTGTGATGGTGTG          |
| <i>cstA</i> <sup>2</sup> | GGCCACTCTAACCAAAGAAC       | AGCCCAAGTTGCATCCAG           |
| <i>iscR</i>              | GTACCGTTGGCTGATATTTCCG     | CAGACCATTTTTACGCAGACGG       |
| <i>fur</i>               | CAGTGCGGAAGATTTATACA       | GGTTCAGTACGCGATATACC         |
| <i>fepA</i>              | GCGAGCGGATACCCGTG          | TGCCGGACCACGCAGAACTT         |
| <i>fyuA</i>              | TGACGGCGACATGATTAACC       | AGACGCAGTTTCACATTCCC         |
| <i>gapA</i>              | CCTGGCTCCGCTGGCTAAAG       | GCGTGAACGGTGGTCATCAGAC       |
| <i>hns</i>               | GAAGAAGAAAGCGCGGCTGC       | GTCAGCGATCAGCATTTTCGCG       |
| <i>ryhB</i>              | GCGGAGAACCTGAAAGCACGA      | AAAAGCCAGCACCCGGC            |
| <i>ompW</i>              | ATGAAGCAGGCGAATTTT         | ACCCAGACTTCCTAACGTAC         |
| <i>cgsA</i>              | GGCCCAAATTCTGAGCTGAA       | AGTCAGAGTTACGGGCATCA         |
| <i>csgE</i>              | GATGGGGAAGCTGGATCACAA      | CGGAGTCTCTTTTCAACGGGAA       |
| <i>leoA</i>              | GTGCAAGCTGCGTCTGAATA       | TGTTACTGAGCTGGCAGAGAA        |
| <i>eltB</i>              | GATGGCAGGCAAAG             | CGACCTGAAATGTTGC             |
| <i>etpB</i>              | GCCCCGGTAAGAAGA            | CAGCCCCACATACCC              |
| <i>rplD</i>              | ACCTGTTCTGCTGCGC           | CCGGGTGCATACCAGTTGCA         |
| <i>rpoA</i>              | ACCCACGACGGTGTGTTGA        | CTCATCGGTCAGGTGGCAGA         |
| <i>sta1</i> (STp)        | CCCCTCTTTTAGTCAGTCAA       | CAACAAAGTTCACAGCAGTAA        |
| <i>sta3</i> (STh)        | CTAAACCAGCAGGGTCTT         | TGCTTTCAGGACTACTTTCA         |
| <i>tia</i>               | GGCGAGATAAGTGATATTTCT      | TCCATGCGAAGTTGTTAT           |
| <i>tufB</i>              | GGGGCACGCCGACTATGTTA       | AACTACCAGGATCGCGCCGT         |

<sup>1</sup>Oligonucleotide sequences previously described in [1] or <sup>2</sup>[2].

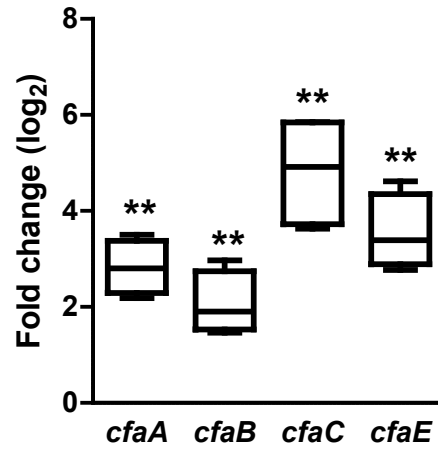

**Figure S1. Effect of iron starvation on expression of genes in the CFA/I operon.** Gene expression analysis of ETEC H10407 was performed following growth to late-log phase (5 hr) in CFA media alone or treated with 50  $\mu$ M Deferoxamine. Data are represented as the fold change ratio of expression in treated vs untreated cultures, calculated from relative expression values using the  $2^{-\Delta\Delta C_t}$  method and normalized against the 16S housekeeping gene. Values are  $\log_2$  transformed. The median is indicated as a band within the box plot. Whiskers represent minimum and maximum values. Statistical analyses were performed using the one sample t-test, \*\* $p < 0.01$ .

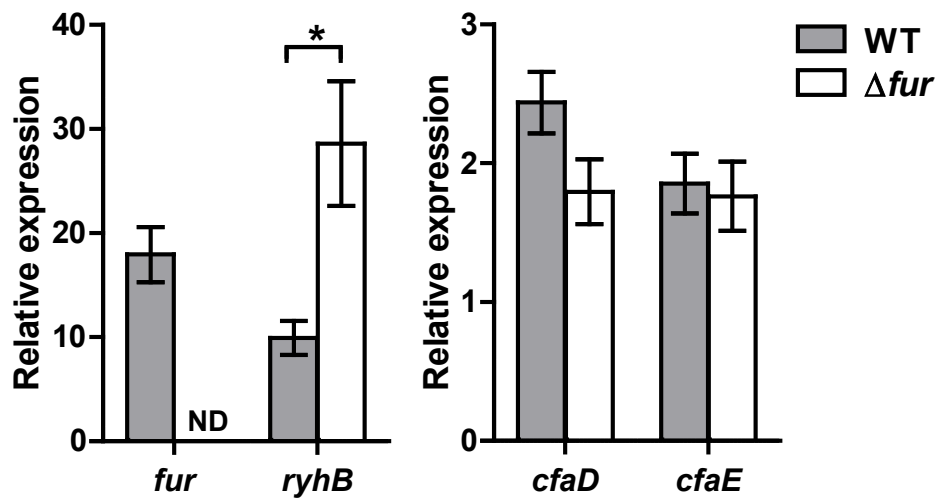

**Figure S2. *fur*, *ryhB*, *cfaD* and *cfaE* gene expression in the H10407 wild-type or  $\Delta fur$  strain in iron-replete media.** Gene expression analysis of ETEC H10407 wild-type (WT) or  $\Delta fur$  was performed following growth to early stationary phase (5 hr) in CFA media. Data are represented as relative expression calculated using the  $2^{-\Delta\Delta Ct}$  method and normalized against a reference condition. *fur* transcripts were not detected (ND) in the  $\Delta fur$ . Means of at least three independent replicates are shown with error bars representing the SEM. Statistical analyses were performed using the Student t-test, \*  $p < 0.05$ .

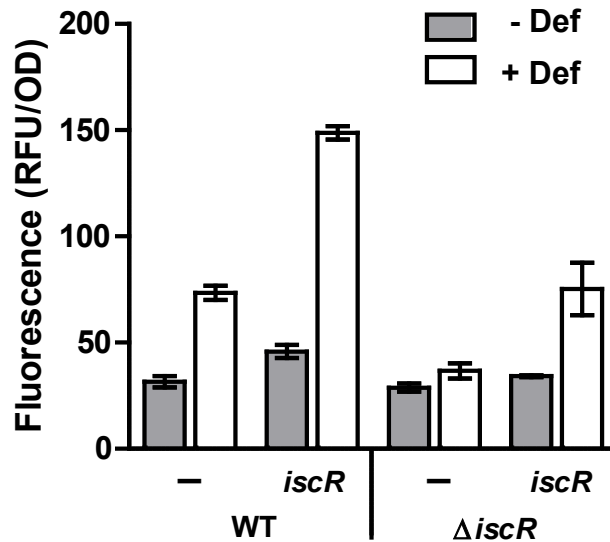

**Figure S3. *cfaA* promoter activity with IscR overexpression.** The *E. coli* BW25113 wild-type (WT) and isogenic  $\Delta$ *iscR* mutant strain containing the pPROBE-*cfaA* transcriptional fusion were cultivated in CFA media in presence or absence of 50  $\mu$ M Deferoxamine (Def). GFP reporter fluorescence was measured following overnight growth in presence of the empty pCA24N vector (-) or in presence of pCA24N-*iscR* (*iscR*). Cultures were performed in presence of 50  $\mu$ M IPTG to induce *iscR* expression. GFP fluorescence was normalized against bacterial density at 600 nm and expressed as relative fluorescent units (RFU). Means of at least three independent replicates are shown with error bars representing the SEM.

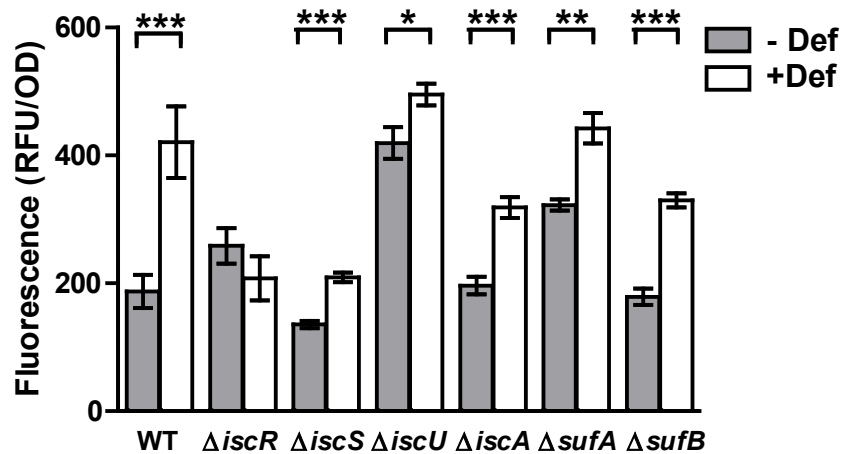

**Figure S4: *cfaA* promoter activity in *E. coli* deletion mutants associated with Fe-S cluster biogenesis.** *E. coli* BW25113 wild-type and mutant strains containing the pPROBE-*cfaA* transcriptional fusion were cultivated in CFA media in presence or absence of 50  $\mu$ M Deferoxamine (Def). GFP reporter fluorescence was measured following overnight growth in the presence of pBAD-*cfaD*. Cultures were performed in presence of 0.66  $\mu$ M L-arabinose for CfaD induction. GFP fluorescence was normalized against bacterial density at 600 nm and expressed as relative fluorescent units (RFU). Means of at least three independent replicates are shown with error bars representing the SEM. Statistical analyses were performed using the Student t-test, \*  $p < 0.05$ , \*\*  $p < 0.01$ , \*\*\*  $p < 0.001$ .

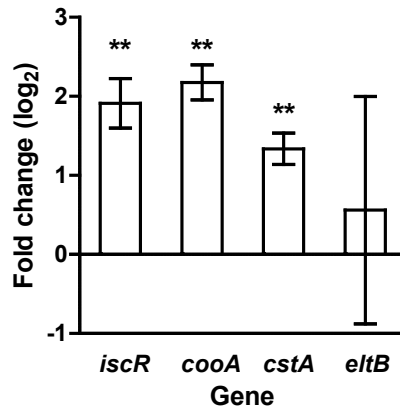

**Figure S5: Effect of iron starvation on gene expression in ETEC E24377A.** *iscR* (IscR), *cooA* (CS1), *cstA* (CS3), and *eltB* (LT) gene expression was evaluated in stationary phase in CFA media alone or treated with 50  $\mu$ M Deferoxamine. Data are represented as the fold change ratio of expression in treated vs untreated cultures, calculated from relative expression values using the  $2^{-\Delta\Delta C_t}$  method. Values are  $\log_2$  transformed. At least three independent replicates were performed with error bars representing the SEM. Statistical analyses were performed using the one sample t-test, \*\* $p < 0.01$ .

## References

1. **Moreno AC, Ferreira LG, Martinez MB.** 2009. Enteroinvasive *Escherichia coli* vs. *Shigella flexneri*: how different patterns of gene expression affect virulence. FEMS microbiology letters **301**:156-163.
2. **Sahl JW, Rasko DA.** 2012. Analysis of Global Transcriptional Profiles of Enterotoxigenic *Escherichia coli* Isolate E24377A. Infection and immunity **80**:1232-1242.
